# Supplementary material for: A Metabolomics Investigation of the Metabolic Changes of Raji B Lymphoma Cells Undergoing Apoptosis Induced by Zinc Ions
Source: MDPI journal article supplement (doi:10.3390/metabo11100689), 2021-10-07
Supplement: s1 [file s1]

# **A metabolomics investigation of the metabolic changes of Raji B lymphoma cells undergoing apoptosis induced by zinc ions**

Naeun Yoon <sup>1,2</sup>, Hyunbeom Lee <sup>1</sup>, Geonhee Lee <sup>3</sup>, Eun Hye Kim <sup>4</sup>, Seong Hwan Kim <sup>4</sup>, Jeong-O Lee <sup>3</sup>, Yunseon Song <sup>2</sup>, Jinyoung Park <sup>1</sup>, So-Dam Kim <sup>2</sup>, Yeojin Kim <sup>2</sup> and Byung Hwa Jung <sup>1,5,\*</sup>

<sup>1</sup> Molecular Recognition Research Center, Korea Institute of Science and Technology, Seoul 02792, Korea

<sup>2</sup> College of Pharmacy, Sookmyung Women's University, Seoul 04310, Korea

<sup>3</sup> Advanced Materials Division, Korea Research Institute of Chemical Technology, Daejeon 34114, Korea

<sup>4</sup> Drug Discovery Platform Research Center, Department of Drug Discovery, Korea Research Institute of Chemical Technology, Daejeon 34114, Korea

<sup>5</sup> Division of Bio-Medical Science and Technology, KIST School, Korea University of Science and Technology (UST), Seoul 02792, Korea

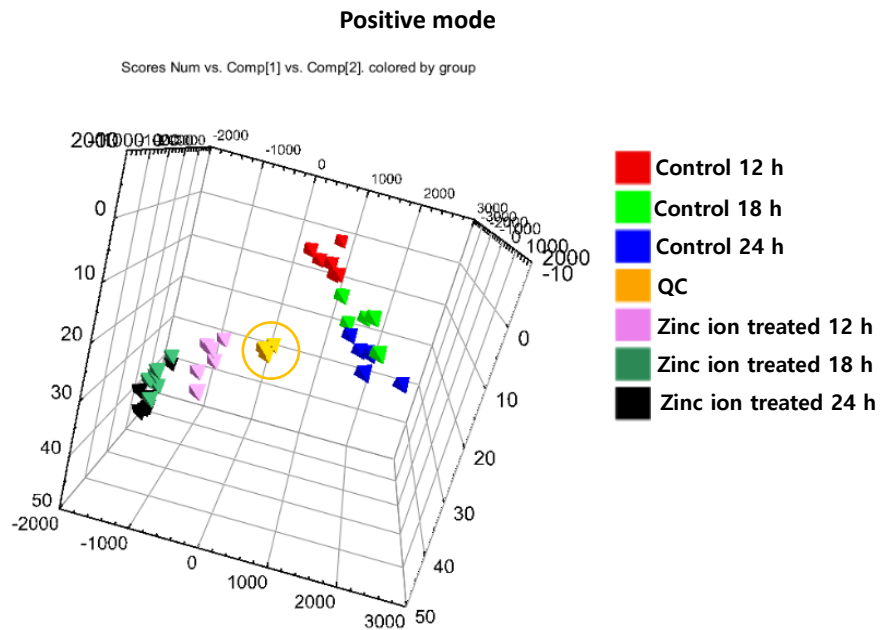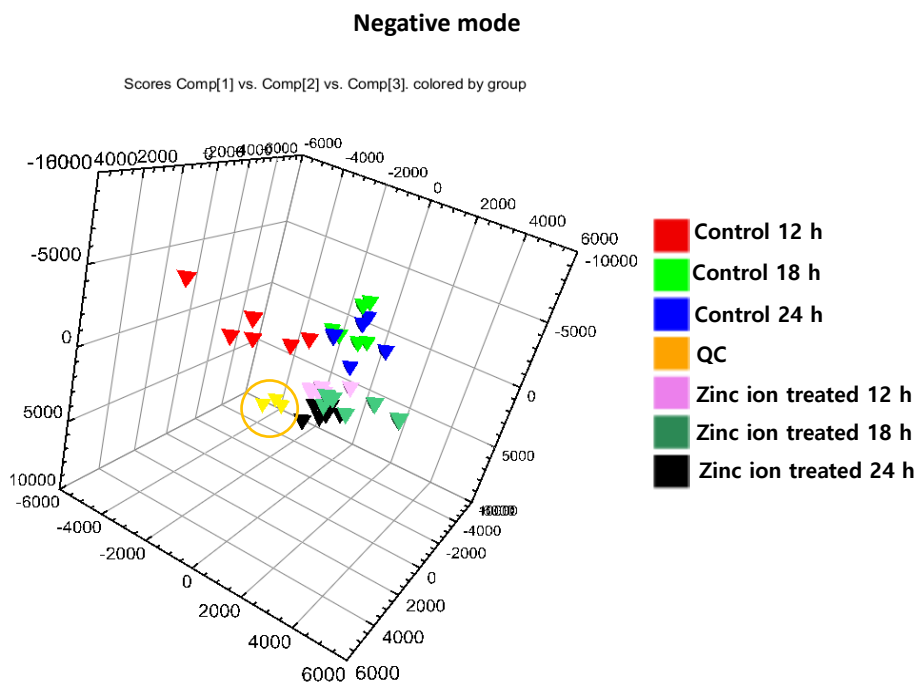

**Supplement Figure S1.** Principal Component Analysis (PCA) plot of quality control (QC) and samples. Positive mode (top) and negative mode (bottom).

### Cleaved Caspase 3

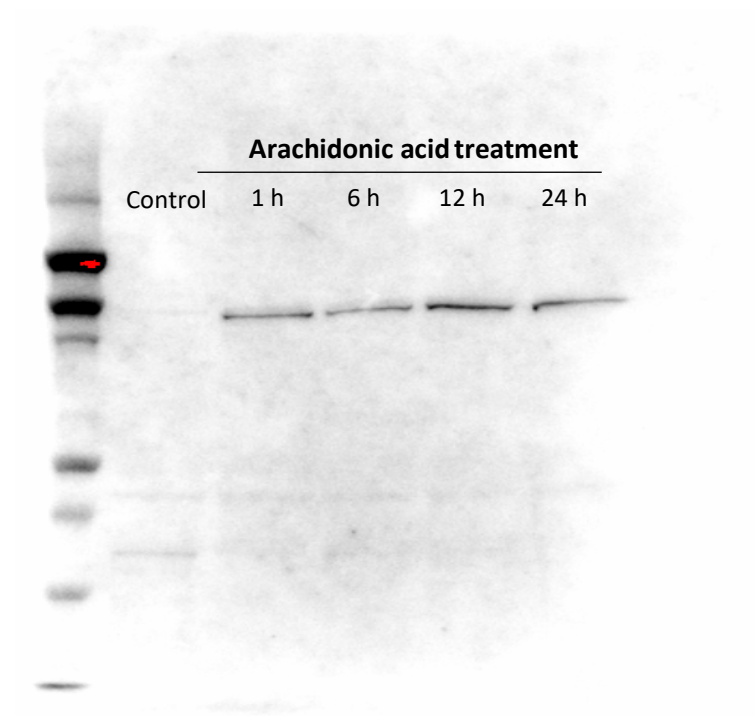

### Cleaved PARP

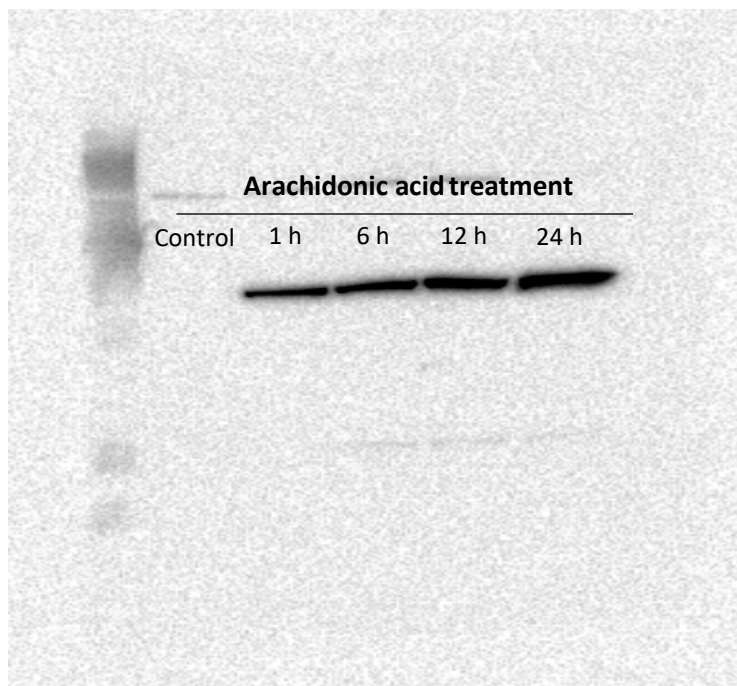

**Supplement Figure S2.** Uncropped original western blot images of figure 6C.

### Cleaved Caspase 9

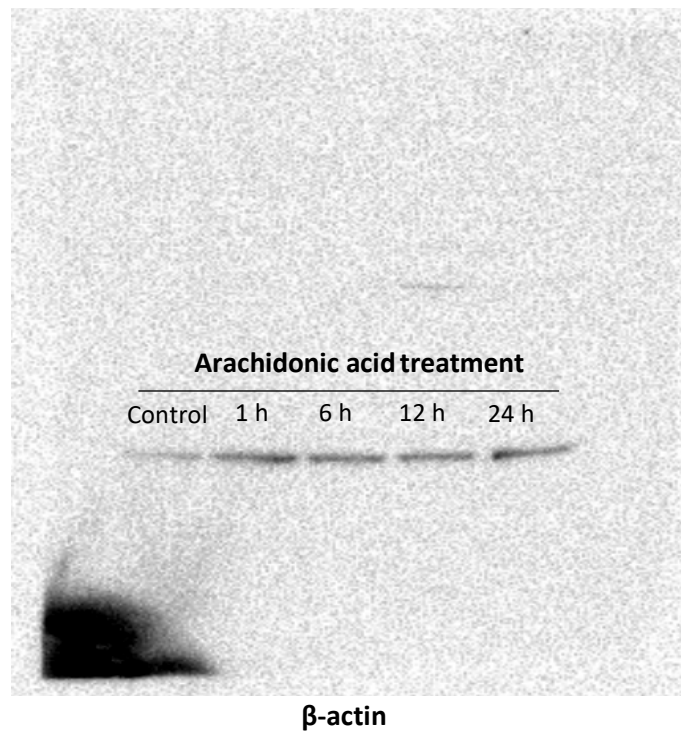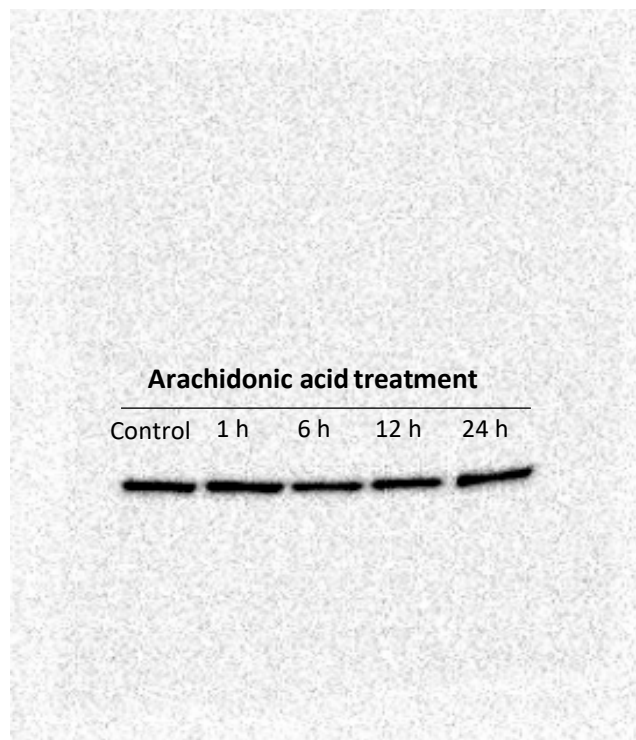

**Supplement Figure S2.** Continued.

### Cleaved PARP

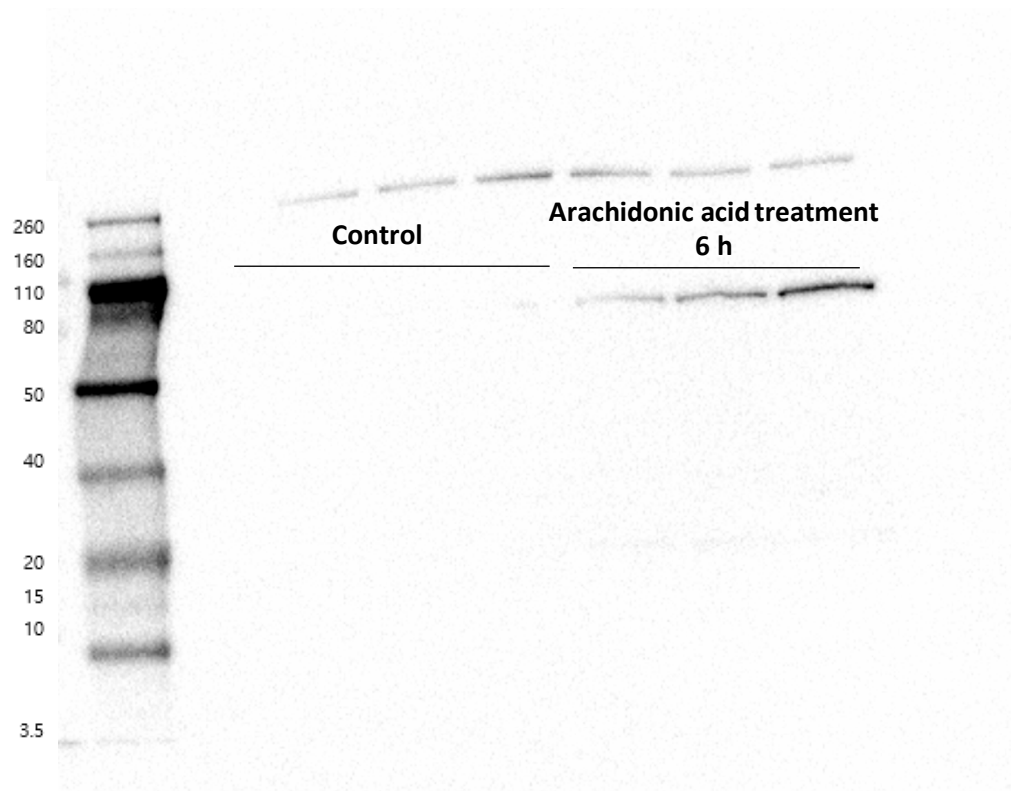

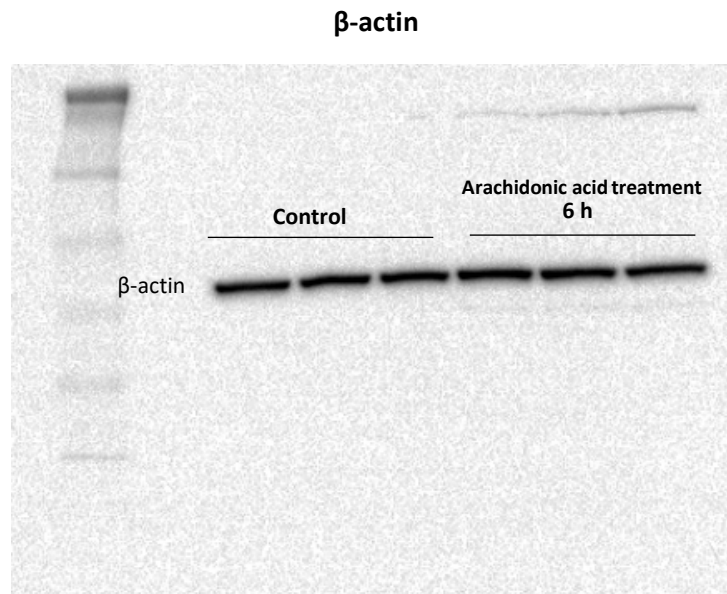

**Supplement Figure S3.** Uncropped original western blot images of figure 6D.

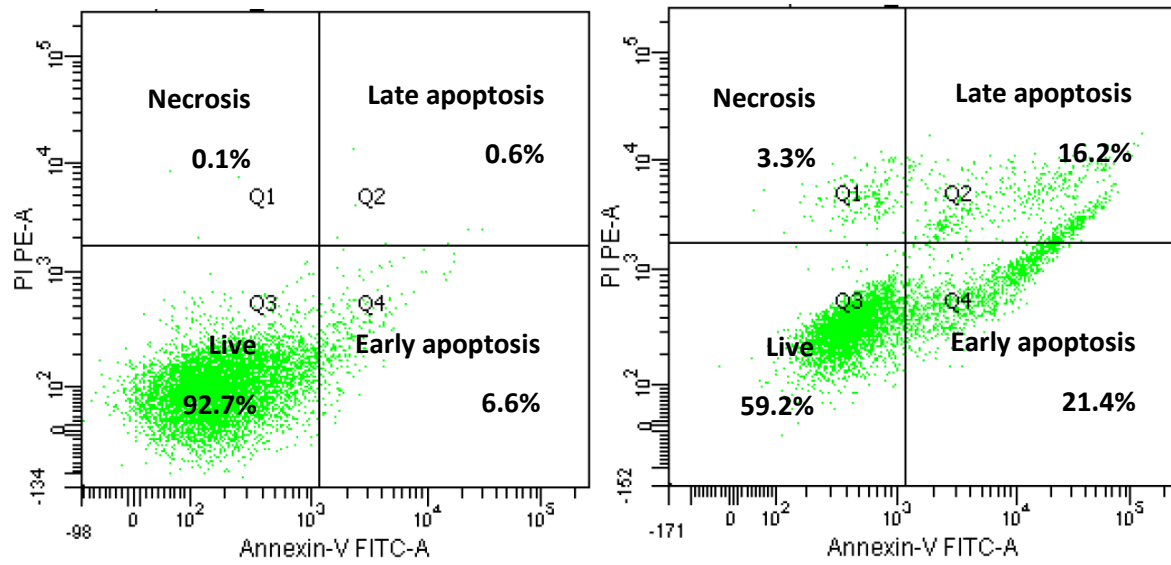

**Supplement Figure S4.** Apoptotic cell population evaluated by flow cytometry analysis following double staining with Annexin-V and propidium iodide (PI). Control group (left) and Raji cells treated with arachidonic acid 20  $\mu$ M for 24 h (right).

**Table S1.** Significantly changed metabolites after Zn ion treatment. Student's t-test was assessed and statistically processed for each time point. Ratio means normalized area ratio of each metabolite between control and Zn ion treated group (normalized intensity of Zn ion treated group/normalized intensity of contraol group)

| Class                                | Metabolite               | zinc 12 h |       |        | zinc 18 h |       |          | zinc 24 h |       |          |
|--------------------------------------|--------------------------|-----------|-------|--------|-----------|-------|----------|-----------|-------|----------|
|                                      |                          | P-value   | Trend | Ratio  | P-value   | Trend | Ratio    | P-value   | Trend | Ratio    |
| Amines                               | N,N'-Dicyclohexylurea    | 2.5E-04   | ↑     | 1.81   | 7.3E-04   | ↑     | 1.92     | 1.7E-01   | ↑     | 1.419    |
| Amino acids, peptides, and analogues | Glutathione              | 2.1E-02   | ↑     | 1.51   | 1.4E-04   | ↓     | 0.304    | 1.6E-02   | ↓     | 0.204    |
| Amino acids, peptides, and analogues | Proline                  | 8.8E-02   | ↑     | 1.48   | 2.9E-03   | ↓     | 0.116    | 2.7E-03   | ↓     | 0.114    |
| Amino acids, peptides, and analogues | Leucine                  | 8.4E-01   | ↑     | 1.04   | 6.7E-03   | ↓     | 0.0868   | 4.9E-04   | ↓     | 0.0551   |
| Amino acids, peptides, and analogues | Threonic acid            | 6.1E-03   | ↑     | 2.16   | 8.6E-03   | ↑     | 1.63     | 2.0E-01   | ↑     | 1.62     |
| Amino acids, peptides, and analogues | N-Acetyl-L-alanine       | 9.0E-03   | ↑     | 3.04   | 6.4E-03   | ↓     | 0.550    | 7.6E-08   | ↓     | 0.147    |
| Amino acids, peptides, and analogues | L-Methionine             | 3.3E-04   | ↑     | 4.61   | 7.4E-03   | ↓     | 0.290    | 3.7E-04   | ↓     | 0.0855   |
| Amino acids, peptides, and analogues | L-Histidine              | 1.1E-05   | ↑     | 2.58   | 2.1E-03   | ↓     | 0.181    | 4.3E-07   | ↓     | 0.0542   |
| Amino acids, peptides, and analogues | L-Carnitine              | 9.1E-02   | ↑     | 1.13   | 4.6E-03   | ↓     | 0.529    | 1.9E-02   | ↓     | 0.167    |
| Amino acids, peptides, and analogues | L-Phenylalanine          | 1.6E-03   | ↑     | 2.30   | 1.6E-02   | ↓     | 0.328    | 1.9E-07   | ↓     | 0.169    |
| Amino acids, peptides, and analogues | L-Arginine               | 2.9E-03   | ↑     | 3.63   | 6.7E-04   | ↓     | 0.531    | 7.6E-03   | ↓     | 0.223    |
| Amino acids, peptides, and analogues | N-Acetyl-DL-methionine   | 1.6E-05   | ↓     | 0.182  | 2.0E-04   | ↓     | 0.0316   | 1.2E-09   | ↓     | 0.0801   |
| Amino acids, peptides, and analogues | L-Tryptophan             | 1.5E-04   | ↑     | 2.90   | 3.3E-05   | ↓     | 0.423    | 2.1E-06   | ↓     | 0.114    |
| Amino acids, peptides, and analogues | Pantothenic acid         | 1.7E-05   | ↑     | 3.36   | 1.4E-06   | ↓     | 0.0676   | 6.5E-08   | ↓     | 0.137    |
| Amino acids, peptides, and analogues | Phe-Tyr                  | 2.6E-03   | ↑     | 1.87   | 6.0E-01   | ↓     | 0.860    | 2.4E-04   | ↓     | 0.415    |
| Benzene and substituted derivatives  | N-formylanthranilic acid | 1.2E-03   | ↑     | 3.07   | 5.8E-03   | ↑     | 1.02     | 3.6E-03   | ↓     | 0.375    |
| Benzene and substituted derivatives  | Phenyllactic acid        | 6.5E-06   | ↓     | 0.0410 | 2.3E-04   | ↓     | 0.0410   | 5.0E-06   | ↓     | 0.00396  |
| Benzene and substituted derivatives  | Hippuric acid            | 1.0E-07   | ↓     | 0.204  | 4.1E-04   | ↓     | 0.0209   | 5.5E-10   | ↓     | 0.146    |
| Benzene and substituted derivatives  | DL-Indole-3-lactic acid  | 2.9E-04   | ↓     | 0.0231 | 4.4E-05   | ↓     | 3.52E-03 | 1.7E-06   | ↓     | 1.45E-03 |
| Carboxylic acids and derivatives     | Sulfinioalanine          | 7.9E-04   | ↑     | 5.90   | 1.1E-05   | ↓     | 0.0136   | 2.0E-08   | ↓     | 0.0132   |
| Hydroxy acids and derivatives        | Malic acid/fumaric acid  | 1.4E-03   | ↓     | 0.306  | 1.8E-01   | ↓     | 0.755    | 4.4E-03   | ↓     | 0.111    |
| Organonitrogen compounds             | Spermidine               | 9.3E-02   | ↓     | 0.788  | 6.6E-06   | ↓     | 0.259    | 3.0E-08   | ↓     | 0.132    |



|                                      |                                     |         |   |          |         |   |          |         |   |          |
|--------------------------------------|-------------------------------------|---------|---|----------|---------|---|----------|---------|---|----------|
| Organooxygen compounds               | Arabinose 5-phosphate               | 6.7E-03 | ↑ | 4.59     | 1.2E-02 | ↓ | 0.431    | 3.5E-03 | ↓ | 0.0671   |
| Organonitrogen compounds             | Phosphorylcholine                   | 4.9E-02 | ↑ | 1.90     | 4.9E-01 | ↓ | 0.818    | 4.9E-02 | ↓ | 0.584    |
| Organosulfonic acids and derivatives | Taurine                             | 1.3E-01 | ↑ | 1.57     | 4.8E-02 | ↓ | 0.672    | 2.5E-01 | ↓ | 0.461    |
| Fatty Acyls                          | Carnosine (beta-alanyl-L-histidine) | 9.3E-02 | ↑ | 2.20     | 9.1E-06 | ↓ | 0.262    | 4.7E-08 | ↓ | 0.117    |
| Fatty Acyls                          | Acetylcarnitine                     | 2.4E-03 | ↑ | 3.82     | 3.2E-03 | ↓ | 0.857    | 3.4E-01 | ↓ | 0.823    |
| Fatty Acyls                          | 3-Carboxy-4-methyl-5-propyl-2-      | 2.0E-04 | ↑ | 2.33     | 4.8E-02 | ↑ | 3.62     | 8.5E-01 | ↑ | 1.04     |
| Fatty Acyls                          | Butyryl-L-carnitine                 | 7.4E-03 | ↑ | 2.41     | 2.9E-04 | ↓ | 0.0178   | 1.7E-07 | ↓ | 0.0937   |
| Fatty Acyls                          | Palmitic acid                       | 1.6E-07 | ↑ | 2.28     | 2.0E-03 | ↑ | 1.41     | 7.7E-03 | ↓ | 0.672    |
| Fatty Acyls                          | Isovalerylcarnitine                 | 1.0E-01 | ↓ | 0.637    | 2.7E-05 | ↓ | 0.223    | 1.3E-01 | ↓ | 0.462    |
| Fatty Acyls                          | 14-fluoro-myristic acid             | 9.1E-06 | ↑ | 1.98     | 5.9E-05 | ↑ | 1.96     | 1.3E-01 | ↑ | 1.50     |
| Fatty Acyls                          | Oleic acid                          | 1.6E-03 | ↓ | 0.069    | 4.8E-02 | ↓ | 0.0164   | 2.9E-03 | ↓ | 0.00487  |
| Fatty Acyls                          | Vaccenic acid                       | 5.1E-04 | ↑ | 1.86     | 5.6E-01 | ↑ | 1.22     | 5.2E-05 | ↓ | 0.257    |
| Fatty Acyls                          | Stearic acid                        | 3.1E-06 | ↑ | 1.97     | 1.5E-02 | ↑ | 1.61     | 5.2E-02 | ↓ | 0.730    |
| Fatty Acyls                          | Hexanoylcarnitine                   | 1.4E-06 | ↑ | 4.71     | 2.4E-03 | ↓ | 0.158    | 2.9E-03 | ↓ | 0.0256   |
| Fatty Acyls                          | Arachidonic acid                    | 2.9E-03 | ↑ | 84.7     | 5.1E-03 | ↑ | 42.3     | 2.6E-03 | ↑ | 16.5     |
| Fatty Acyls                          | (±)12,13-DiHOME                     | 2.9E-04 | ↑ | 1.97     | 1.8E-02 | ↑ | 1.91     | 3.7E-01 | ↑ | 1.09     |
| Fatty Acyls                          | (4Z,7Z,10Z,13Z,16Z,19Z)-4,7,10,13,1 | 1.7E-03 | ↑ | 43.3     | 4.8E-03 | ↑ | 7.65     | 3.1E-03 | ↑ | 3.88     |
| Fatty Acyls                          | 7Z, 10Z, 13Z, 16Z, 19Z-             | 1.5E-02 | ↑ | 46.1     | 2.0E-02 | ↑ | 6.47     | 1.7E-02 | ↑ | 3.37     |
| Fatty Acyls                          | Adrenic acid                        | 4.6E-03 | ↑ | 37.5     | 4.1E-03 | ↑ | 5.10     | 5.8E-03 | ↑ | 3.61     |
| Fatty Acyls                          | Palmitoyl-L-carnitine               | 3.6E-02 | ↓ | 0.0670   | 2.3E-05 | ↓ | 0.0322   | 2.0E-04 | ↓ | 0.0262   |
| Glutamic acid and derivatives        | Folic acid                          | 1.6E-01 | ↓ | 0.859    | 5.8E-04 | ↑ | 1.65     | 7.1E-02 | ↓ | 0.868    |
| Glutamic acid and derivatives        | Glutamate                           | 5.8E-05 | ↑ | 2.91     | 4.4E-03 | ↓ | 0.960    | 6.6E-02 | ↓ | 0.680    |
| Glycerophospholipids                 | 1-Stearoylglycerophosphocholine     | 1.4E-04 | ↑ | 4.67     | 2.0E-04 | ↑ | 1.80     | 1.4E-01 | ↑ | 1.58     |
| Glycerophospholipids                 | Glycerophosphocholine               | 7.3E-04 | ↑ | 1.13E+03 | 7.0E-06 | ↑ | 1.04E+03 | 1.2E-01 | ↑ | 5.75E+01 |
| Glycerophospholipids                 | Lyso phosphatidylcholine 16:1       | 4.2E-03 | ↑ | 2.01     | 3.5E-05 | ↑ | 1.57     | 6.6E-01 | ↑ | 1.11     |
| Glycerophospholipids                 | Phosphatidylcholine (0:0/18:0)      | 3.8E-04 | ↑ | 4.17     | 6.2E-03 | ↑ | 1.87     | 1.9E-01 | ↑ | 1.18     |
| Glycerophospholipids                 | Phosphatidylcholine 14:0-18:2       | 5.7E-04 | ↑ | 1.60     | 8.7E-03 | ↑ | 1.76     | 1.8E-01 | ↓ | 0.846    |
| Glycerophospholipids                 | Phosphatidylcholine 16:0-16:1       | 4.4E-03 | ↑ | 1.27     | 1.6E-01 | ↑ | 1.28     | 5.2E-02 | ↓ | 0.737    |
| Glycerophospholipids                 | Phosphatidylcholine 36:4            | 1.7E-04 | ↑ | 10.1     | 8.0E-06 | ↑ | 6.82     | 3.0E-02 | ↑ | 9.19     |

|                                         |                                       |         |   |        |         |   |        |         |   |        |
|-----------------------------------------|---------------------------------------|---------|---|--------|---------|---|--------|---------|---|--------|
| Glycerophospholipids                    | Phosphatidylcholine lyso 16:0         | 5.9E-05 | ↑ | 2.69   | 1.4E-01 | ↓ | 0.894  | 1.2E-02 | ↓ | 0.724  |
| Glycerophospholipids                    | Phosphatidylethanolamine              | 3.1E-04 | ↑ | 1.84   | 1.5E-01 | ↓ | 0.7549 | 3.7E-02 | ↓ | 0.235  |
| Glycerophospholipids                    | Phosphatidylethanolamine lyso 18:0    | 3.7E-03 | ↑ | 1.86   | 4.3E-01 | ↓ | 0.894  | 6.4E-03 | ↓ | 0.468  |
| Glycerophospholipids                    | Phosphatidylethanolamine lyso alkenyl | 2.4E-04 | ↓ | 0.646  | 3.6E-02 | ↓ | 0.262  | 1.3E-03 | ↓ | 0.127  |
| Glycerophospholipids                    | Phosphatidylinositol lyso 18:0        | 3.2E-03 | ↑ | 3.40   | 1.3E-01 | ↑ | 1.73   | 8.9E-05 | ↓ | 0.410  |
| Glycerophospholipids                    | sn-Glycerol 3-phosphate               | 9.8E-07 | ↑ | 2.66   | 1.4E-02 | ↑ | 1.59   | 9.2E-05 | ↓ | 0.586  |
| Nucleosides, nucleotides, and analogues | 5'-Deoxy-5'-(methylthio)adenosine     | 7.0E-06 | ↑ | 1.73   | 1.0E-07 | ↑ | 1.37   | 2.1E-03 | ↓ | 0.398  |
| Nucleosides, nucleotides, and analogues | Adenosine monophosphate               | 2.7E-05 | ↑ | 36.4   | 9.8E-07 | ↓ | 0.100  | 2.7E-06 | ↓ | 0.116  |
| Nucleosides, nucleotides, and analogues | ADP                                   | 6.7E-04 | ↓ | 0.390  | 2.7E-03 | ↓ | 0.434  | 7.7E-07 | ↓ | 0.384  |
| Nucleosides, nucleotides, and analogues | Fructose/Lactic acid(M-H)             | 2.0E-01 | ↑ | 1.39   | 2.2E-04 | ↓ | 0.395  | 2.9E-06 | ↓ | 0.246  |
| Nucleosides, nucleotides, and analogues | GMP                                   | 5.8E-03 | ↓ | 0.243  | 1.3E-04 | ↑ | 2.52   | 8.8E-08 | ↓ | 0.240  |
| Nucleosides, nucleotides, and analogues | Inosine                               | 2.1E-03 | ↑ | 8.59   | 3.4E-02 | ↑ | 1.57   | 3.4E-06 | ↓ | 0.221  |
| Nucleosides, nucleotides, and analogues | Inosine-5'-monophosphate              | 5.0E-05 | ↑ | 15.9   | 6.6E-04 | ↑ | 2.84   | 2.0E-06 | ↓ | 0.212  |
| Nucleosides, nucleotides, and analogues | N6-(1,2-dicarboxyethyl)-AMP           | 1.5E-04 | ↓ | 0.0228 | 5.6E-02 | ↓ | 0.291  | 3.6E-04 | ↓ | 0.0326 |
| Nucleosides, nucleotides, and analogues | Succinic acid                         | 5.2E-04 | ↓ | 0.0577 | 1.4E-02 | ↓ | 0.0462 | 1.9E-03 | ↓ | 0.0721 |
| Nucleosides, nucleotides, and analogues | Uridine                               | 1.1E-04 | ↓ | 0.0577 | 1.1E-03 | ↓ | 0.234  | 2.2E-05 | ↓ | 0.0388 |
| Nucleosides, nucleotides, and analogues | Uridine monophosphate (UMP)           | 1.1E-04 | ↓ | 0.0397 | 9.4E-05 | ↑ | 2.14   | 8.9E-04 | ↓ | 0.143  |

**Table S2.** The information of identified metabolites in metabolomics study. The Metabolomics Standards Initiative (MSI), retention time (RT), ionization mode, adduct, and used database are shown in the below.

| Class                                | Identified metabolites   | RT    | Adduct | M/Z    | Mode     | MSI<br>chemical<br>identification<br>level | Database |
|--------------------------------------|--------------------------|-------|--------|--------|----------|--------------------------------------------|----------|
| Amines                               | N,N'-Dicyclohexylurea    | 10.82 | M+H    | 225.19 | positive | level 3                                    | METLIN   |
| Amino acids, peptides, and analogues | Glutathione              | 1.45  | M+H    | 308.08 | positive | level 2                                    | HMDB     |
| Amino acids, peptides, and analogues | L-Arginine               | 0.99  | M+H    | 175.11 | positive | level 2                                    | HMDB     |
| Amino acids, peptides, and analogues | L-Carnitine              | 1.03  | M+H    | 162.10 | positive | level 2                                    | HMDB     |
| Amino acids, peptides, and analogues | Leucine                  | 1.05  | M+H    | 132.06 | positive | level 2                                    | HMDB     |
| Amino acids, peptides, and analogues | L-Histidine              | 0.99  | M-H    | 154.06 | negative | level 2                                    | METLIN   |
| Amino acids, peptides, and analogues | L-Methionine             | 1.40  | M+H    | 150.05 | positive | level 2                                    | MASSBANK |
| Amino acids, peptides, and analogues | L-Phenylalanine          | 4.77  | M+H    | 166.08 | positive | level 2                                    | METLIN   |
| Amino acids, peptides, and analogues | L-Tryptophan             | 6.24  | M+H    | 188.06 | positive | level 2                                    | MASSBANK |
| Amino acids, peptides, and analogues | N-Acetyl-DL-methionine   | 6.44  | M-H    | 190.05 | negative | level 2                                    | METLIN   |
| Amino acids, peptides, and analogues | N-Acetyl-L-alanine       | 2.22  | M-H    | 130.09 | negative | level 2                                    | METLIN   |
| Amino acids, peptides, and analogues | Pantothenic acid         | 5.89  | M+H    | 220.11 | positive | level 2                                    | HMDB     |
| Amino acids, peptides, and analogues | Phe-Tyr                  | 14.73 | M-H    | 327.13 | negative | level 2                                    | METLIN   |
| Amino acids, peptides, and analogues | Proline                  | 1.04  | M+H    | 116.06 | positive | level 2                                    | HMDB     |
| Amino acids, peptides, and analogues | Threonic acid            | 1.71  | M+H    | 137.04 | positive | level 2                                    | HMDB     |
| Benzene and substituted derivatives  | DL-Indole-3-lactic acid  | 8.08  | M+H    | 206.07 | positive | level 2                                    | MASSBANK |
| Benzene and substituted derivatives  | Hippuric acid            | 7.37  | M-H    | 178.05 | negative | level 2                                    | METLIN   |
| Benzene and substituted derivatives  | N-formylanthranilic acid | 1.32  | M+H    | 166.04 | positive | level 3                                    | METLIN   |
| Benzene and substituted derivatives  | Phenyllactic acid        | 8.00  | M-H    | 165.06 | negative | level 2                                    | METLIN   |
| Carboxylic acids and derivatives     | Sulfinioalanine          | 0.99  | M+H    | 154.02 | positive | level 2                                    | METLIN   |

|                               |                                                              |       |        |        |          |         |                   |
|-------------------------------|--------------------------------------------------------------|-------|--------|--------|----------|---------|-------------------|
| Fatty Acyls                   | (±)12,13-DiHOME                                              | 12.69 | M-H    | 313.24 | negative | level 2 | MASSBANK          |
| Fatty Acyls                   | (4Z,7Z,10Z,13Z,16Z,19Z)-4,7,10,13,16,19-Docosahexaenoic acid | 15.19 | M-H    | 327.23 | negative | level 1 | MASSBANK          |
| Fatty Acyls                   | 14-fluoro-myristic acid                                      | 10.82 | M+H    | 247.17 | positive | level 3 | METLIN            |
| Fatty Acyls                   | 3-Carboxy-4-methyl-5-propyl-2-furanpropanoic acid            | 12.15 | M-H    | 239.07 | negative | level 2 | MASSBANK          |
| Fatty Acyls                   | 7Z, 10Z, 13Z, 16Z, 19Z-docosapentaenoic acid                 | 15.43 | M-H    | 329.25 | negative | level 2 | METLIN            |
| Fatty Acyls                   | Acetylcarnitine                                              | 1.05  | M+H    | 204.12 | positive | level 2 | HMDB              |
| Fatty Acyls                   | Adrenic acid                                                 | 15.77 | M-H    | 331.26 | negative | level 2 | METLIN            |
| Fatty Acyls                   | Arachidonic acid                                             | 15.22 | M-H    | 303.23 | negative | level 1 | In house database |
| Fatty Acyls                   | Butyryl-L-carnitine                                          | 5.48  | M+H    | 232.15 | positive | level 2 | METLIN            |
| Fatty Acyls                   | Carnosine (beta-alanyl-L-histidine)                          | 0.86  | M+X    | 156.07 | positive | level 2 | MASSBANK          |
| Fatty Acyls                   | Hexanoylcarnitine                                            | 7.63  | M+H    | 260.18 | positive | level 2 | HMDB              |
| Fatty Acyls                   | Isovalerylcarnitine                                          | 6.57  | M+H    | 246.16 | positive | level 2 | HMDB              |
| Fatty Acyls                   | Oleic acid                                                   | 13.20 | M-H    | 281.25 | negative | level 2 | MASSBANK          |
| Fatty Acyls                   | Palmitic acid                                                | 15.56 | M-H    | 255.23 | negative | level 2 | MASSBANK          |
| Fatty Acyls                   | Palmitoyl-L-carnitine                                        | 13.00 | M+H    | 400.33 | positive | level 2 | METLIN            |
| Fatty Acyls                   | Stearic acid                                                 | 16.20 | M-H    | 283.26 | negative | level 2 | HMDB              |
| Fatty Acyls                   | Vaccenic acid                                                | 15.73 | M-H    | 281.25 | negative | level 2 | MASSBANK          |
| Glutamic acid and derivatives | Folic acid                                                   | 7.06  | M-H    | 440.13 | negative | level 2 | MASSBANK          |
| Glutamic acid and derivatives | Glutamate                                                    | 1.20  | M+H    | 148.04 | positive | level 2 | HMDB              |
| Glycerophospholipids          | 1-Stearoylglycerophosphocholine                              | 15.18 | M+H    | 524.35 | positive | level 2 | MASSBANK          |
| Glycerophospholipids          | Glycerophosphocholine                                        | 1.14  | M+H    | 258.10 | positive | level 2 | METLIN            |
| Glycerophospholipids          | phosphatidylcholine lyso 16:1                                | 11.48 | M+H    | 494.15 | positive | level 2 | MASSBANK          |
| Glycerophospholipids          | Phosphatidylcholine (0:0/18:0)                               | 15.19 | M+FA-H | 568.36 | negative | level 2 | MASSBANK          |
| Glycerophospholipids          | Phosphatidylcholine 14:0-18:2                                | 17.18 | M+FA-H | 774.52 | negative | level 2 | MASSBANK          |
| Glycerophospholipids          | Phosphatidylcholine 16:0-16:1                                | 14.44 | M+FA-H | 452.28 | negative | level 2 | MASSBANK          |

|                                         |                                            |       |                      |        |          |         |                 |
|-----------------------------------------|--------------------------------------------|-------|----------------------|--------|----------|---------|-----------------|
| Glycerophospholipids                    | Phosphatidylcholine 36:4                   | 17.77 | M+H                  | 782.54 | positive | level 3 | MASSBANK        |
| Glycerophospholipids                    | Phosphatidylcholine lyso 16:0              | 14.41 | M+FA-H               | 540.33 | negative | level 2 | MASSBANK        |
| Glycerophospholipids                    | Phosphatidylethanolamine (18:1(9Z)/0:0)    | 14.64 | M+H                  | 480.29 | positive | level 2 | METLIN          |
| Glycerophospholipids                    | Phosphatidylethanolamine lyso 18:0         | 15.21 | M-H                  | 480.31 | negative | level 2 | MASSBANK        |
| Glycerophospholipids                    | Phosphatidylethanolamine lyso alkenyl 16:0 | 14.81 | M-H                  | 436.28 | negative | level 2 | MASSBANK        |
| Glycerophospholipids                    | Phosphatidylinositol lyso 18:0             | 16.83 | M-H                  | 599.31 | negative | level 2 | MASSBANK        |
| Glycerophospholipids                    | sn-Glycerol 3-phosphate                    | 1.14  | M-H                  | 171.01 | negative | level 2 | MASSBANK        |
| Hydroxy acids and derivatives           | Malic acid/fumaric acid (21, neg)          | 1.92  | M-H <sub>2</sub> O-H | 115.00 | negative | level 2 | METLIN          |
| Nucleosides, nucleotides, and analogues | 5'-Deoxy-5'-(methylthio)adenosine          | 6.56  | M+H                  | 298.09 | positive | level 2 | HMDB            |
| Nucleosides, nucleotides, and analogues | Adenosine monophosphate                    | 1.55  | M+H                  | 348.06 | positive | level 2 | HMDB            |
| Nucleosides, nucleotides, and analogues | ADP (245, neg)                             | 1.41  | M-H                  | 426.02 | negative | level 2 | MASSBANK        |
| Nucleosides, nucleotides, and analogues | Fructose/Lactic acid(M-H)                  | 1.59  | M-2H                 | 89.02  | negative | level 3 | METLIN          |
| Nucleosides, nucleotides, and analogues | GMP                                        | 1.71  | M-H                  | 362.05 | negative | level 2 | METLIN          |
| Nucleosides, nucleotides, and analogues | Inosine                                    | 4.37  | M-H                  | 267.07 | negative | level 2 | METLIN          |
| Nucleosides, nucleotides, and analogues | Inosine-5'-monophosphate                   | 1.72  | M-H                  | 347.04 | negative | level 2 | METLIN          |
| Nucleosides, nucleotides, and analogues | N6-(1,2-dicarboxyethyl)-AMP                | 5.33  | M-H                  | 462.07 | negative | level 2 | METLIN          |
| Nucleosides, nucleotides, and analogues | Succinic acid                              | 2.21  | M-H                  | 117.02 | negative | level 2 | METLIN          |
| Nucleosides, nucleotides, and analogues | Uridine                                    | 2.29  | M-X                  | 306.06 | negative | level 2 | MASSBANK        |
| Nucleosides, nucleotides, and analogues | Uridine monophosphate (UMP)                | 1.42  | M-H                  | 323.03 | negative | level 2 | METLIN          |
| Organonitrogen compounds                | Phosphorylcholine                          | 1.06  | M+H                  | 184.07 | positive | level 2 | METLIN          |
| Organonitrogen compounds                | Spermidine                                 | 1.03  | M+H                  | 146.11 | positive | level 2 | MASSBANK        |
| Organooxygen compounds                  | Arabinose 5-phosphate                      | 1.23  | M-H <sub>2</sub> O-H | 211.00 | negative | level 2 | MASSBANK/METLIN |
| Organosulfonic acids and derivatives    | Taurine                                    | 1.11  | M+H                  | 126.02 | positive | level 2 | METLIN          |
